# Supplementary material
Source: HighWire-hosted journal article supplement (https://cmaj.ca/highwire/filestream/150860/field_highwire_adjunct_files/0/231682-res-1-at.pdf)
Supplement: 231682-res-1-at.pdf [file 231682-res-1-at.pdf]

# Supplement to: Identifying strategies to accelerate the elimination of cervical cancer in British Columbia: a modelling study

Reka E. Pataky, PhD<sup>1,2</sup>, Sara Izadi-Najafabadi, PhD<sup>1,2</sup>, Laurie W. Smith, MPH BN<sup>1,3</sup>, Anna Gottschlich, PhD<sup>4</sup>, Diana Ionescu, MD<sup>5,6</sup>, Lily Proctor, MD MPH<sup>5,6</sup>, Gina S. Ogilvie, MD DrPH<sup>3,7\*</sup> and Stuart Peacock, DPhil<sup>1,8\*</sup>

1. Cancer Control Research, BC Cancer, Vancouver BC
2. Canadian Centre for Applied Research in Cancer Control (ARCC)
3. Women's Health Research Institute, BC Women's Hospital and Health Centre, Vancouver BC
4. Karmanos Cancer Institute, Wayne State University, Detroit MI, USA
5. Faculty of Medicine, University of British Columbia, Vancouver BC
6. Cervix Screening Program, BC Cancer, Vancouver BC
7. School of Population and Public Health, University of British Columbia, Vancouver BC
8. Faculty of Health Sciences, Simon Fraser University, Vancouver BC

\*co-senior authors

## 1. OncoSim-Cervical model: vaccination and screening design

The OncoSim model, previously called the Cancer Risk Management Model (CRMM in earlier publications), is led and supported by the Canadian Partnership Against Cancer (CPAC), and developed by a team from Statistics Canada [1]. There are currently five OncoSim models: four cancer-specific models for breast, colorectal, lung and cervical cancer, and a fifth “all cancers” model for high-level projections of cancers across 32 anatomic sites [2].

An interacting-agent microsimulation model of HPV transmission and infection (HPVMM; previously called CRMM-HPV in Miller *et al.*) is integrated with OncoSim-Cervical, a microsimulation model that simulates the natural history of cervical cancer in the Canadian population[3].

HPVMM simulates HPV transmission through sexual interactions based on age- and sex-dependent patterns of heterosexual partnership. The transmission and natural history of HPV infection and clearance is modeled separately for HPV type 16, 18, 11, 6, other high-risk types, and other low-risk types. Model parameters were calibrated to fit HPV prevalence by age and HPV type from published data [4, 5] and unpublished data from the HPV FOCAL trial [6]. Figures illustrating model fit are available in Miller *et al.*[3]. HPVMM also models the impact of HPV vaccination programs with parameters for vaccine type (bivalent, quadrivalent, nonavalent), age to vaccinate, sex, vaccine effectiveness, and duration of immunity. Vaccination is modelled as a single state (i.e., vaccinated or unvaccinated). The model does not consider the number of vaccine doses required, and does not model the effect of incomplete courses. In this analysis, we made no changes to the model default assumptions that vaccination is fully effective at stopping transmission of the HPV strains targeted by each vaccine type, and that immunity does not wane over time; however, these parameters can be altered in HPVMM. Herd immunity is not specifically modelled, but can arise in the interacting-agent model as a result of modelled vaccine coverage and protection.

In this analysis, we replicated British Columbia’s (BC) historical vaccination program design for all scenarios. Publicly-funded school-based vaccination of girls in Grade 6 (11-12 years old) was launched in 2008 using the quadrivalent HPV vaccine. In 2017, the program was expanded to boys in Grade 6, and the quadrivalent vaccine was replaced with the nonavalent vaccine. Vaccination coverage among girls by Grade 9 was approximately 70% in 2020[7].

Detailed HPV infection rates from HPVMM are input into the OncoSim-Cervical model, to initiate HPV infection in simulated individuals. OncoSim-Cervical then simulates the subsequent incidence of precancerous lesions and progression to cervical cancer through a series of clinical phases. Infection with high-risk HPV is required to progress through clinical phases. In the absence of screening, clinical detection of cancer is assumed to occur two years after pre-cancerous lesions reach a cancerous state. General model structure and assumptions were adapted from the HPV-Advise model by Brisson *et al.*[8], and calibrated to fit data from the Canadian Cancer Registry[9] and FOCAL trial [6]. For this analysis, we compared simulated cervical cancer incidence rates for BC against historical incidence rates published by the BC Cancer Registry to verify adequate fit (Figure S1).

Screening, follow-up, treatment of precancerous lesions, and cervical cancer treatment have been built into OncoSim-Cervical. Women are recruited into screening based on a user-defined set of parameters defining eligibility, including age, calendar year, and screening history. Screening can be conducted by

different modalities (e.g., cytology or HPV testing), at user-specified time intervals. Individuals enter screening for the first time based on the user-defined recruitment rate. By default, and in this analysis, individuals who do not enter screening on their first attempt do not return to screening. This assumption can be modified in the model. Women who are eligible to be rescreened at the defined screening interval receive a screening test with a probability based on the user-defined rescreening rate. Those who are not rescreened (i.e., who miss a screen) return at their next scheduled screen for another rescreening attempt.

In this analysis, we transitioned from cytology screening to HPV-based screening gradually over 5 years. In the first year, 20% of individuals due for screening were offered primary HPV testing, and the remaining 80% were offered cytology. This was increased in 20% increments each year, until all screen-eligible females were offered HPV testing only.

In OncoSim-Cervical, the results of cytology screening vary according to the underlying disease status of the simulated individual. The distribution of test results is based on the results of Blanks and Kelly[10] and adjusted as part of the calibration process. Results of HPV DNA testing are based on the underlying infection status of the simulated individual, and the test is assumed to be fully accurate (100% sensitivity and 100% specificity for infection status).

Positive results on screening initiate a user-defined follow-up protocol. If an individual is non-compliant with a recommended follow-up, based on the probability defined by protocol-specific follow-up compliance parameters, they are discharged to the regular screening program and return at their next scheduled screening interval.

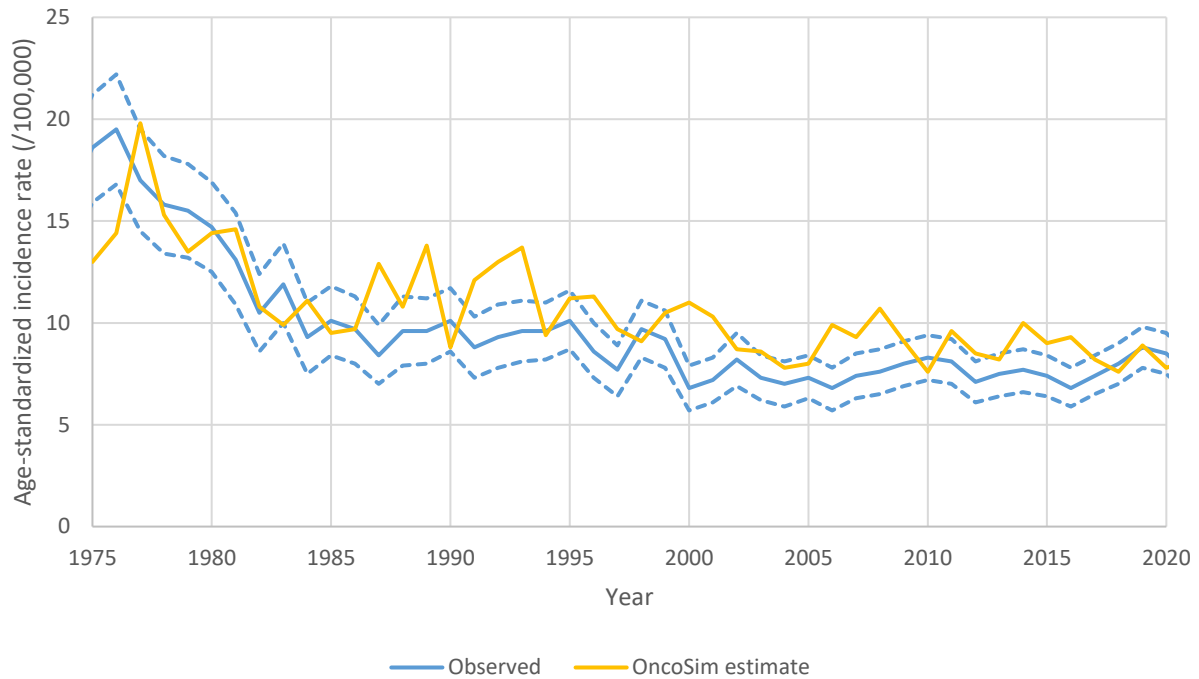

FIGURE S1: HISTORICAL AGE-STANDARDIZED INCIDENCE RATE OF CERVICAL CANCER FOR BRITISH COLUMBIA, 1975-2020

Age-standardized incidence rate of cervical cancer for BC. Dotted lines indicate 95% confidence interval for observed incidence rates. Age standardized to 2011 Canadian Population. Observed value for BC obtained from BC Cancer Registry published estimates [11].

## 2. Sensitivity Analysis

TABLE S1: SUMMARY OF MODEL PARAMETERS FOR SENSITIVITY ANALYSIS SCENARIOS

| Scenario                              | OncoSim model parameter |                                  |                              |
|---------------------------------------|-------------------------|----------------------------------|------------------------------|
|                                       | Immunization coverage   | Recruitment rate (ever screened) | Rescreen rate among screened |
| Base case                             | 70%                     | 90%                              | 80%                          |
| Low participation                     | 70%                     | <b>85%</b>                       | <b>75%</b>                   |
| Low vaccination                       | <b>65%</b>              | 90%                              | 80%                          |
| Low participation and low vaccination | <b>65%</b>              | <b>85%</b>                       | <b>75%</b>                   |

The low participation scenario assumes 65% on-time screening, based on the range observed across BC Health Authorities[12]. This is achieved with reduced screening recruitment rate and reduced rescreen rate among screening participants, based on the lower range of historical retention rates[12].

The lower vaccination scenario assumes 65% vaccine coverage, based on the historical range observed in the BC school-based vaccination programs[7].

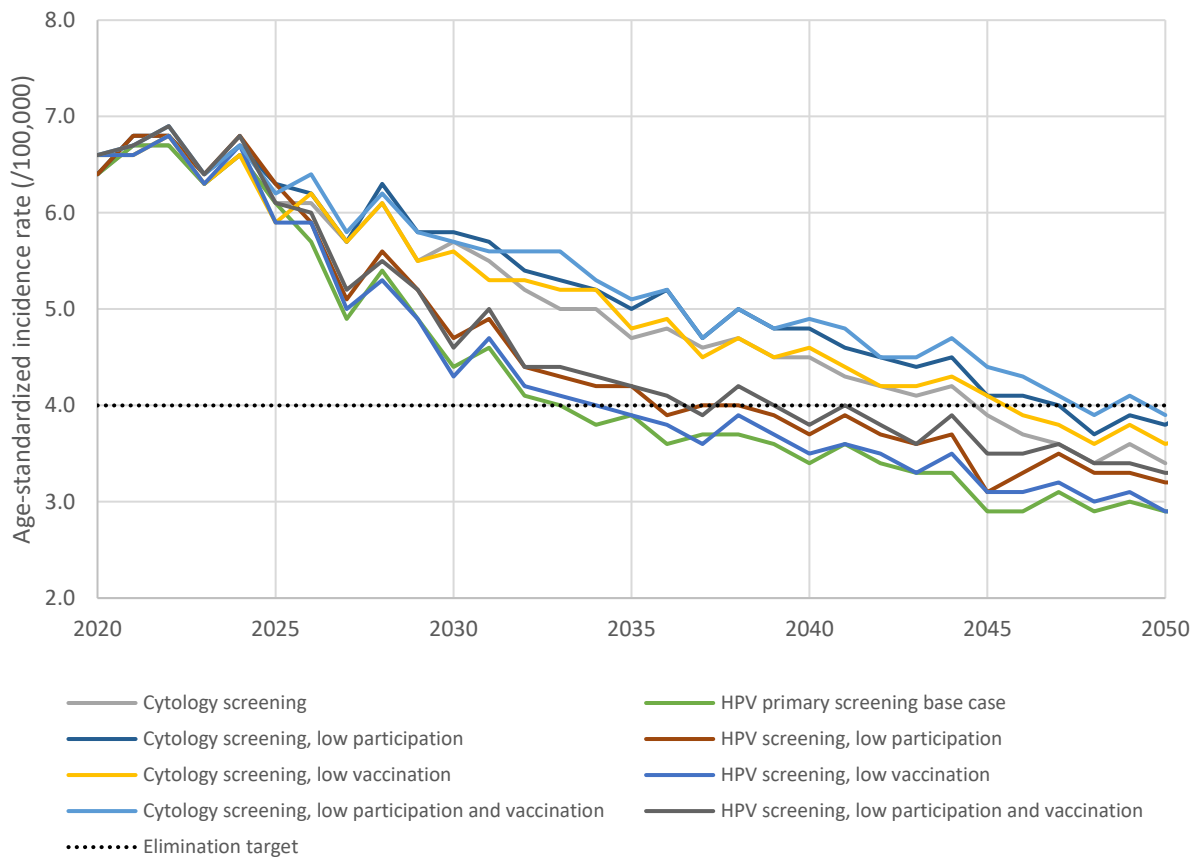

FIGURE S2: PROJECTED AGE-STANDARDIZED INCIDENCE RATE FOR BRITISH COLUMBIA

Age-standardized to WHO World Population [13].

TABLE S2: YEAR OF ELIMINATION OF CERVICAL CANCER, AND NUMBER OF CERVICAL CANCER CASES IN BC, 2023-2050

| Scenario                                                | Elimination year | Cervical cancer cases |
|---------------------------------------------------------|------------------|-----------------------|
| Cytology screening, base case                           | 2045             | 6,627                 |
| Cytology screening, lower participation                 | 2048             | 6,945                 |
| Cytology screening, lower vaccination                   | 2046             | 6,699                 |
| Cytology screening, lower participation and vaccination | >2050            | 7,018                 |
| HPV screening, base case                                | 2034             | 5,685                 |
| HPV screening, lower participation                      | 2039             | 6,027                 |
| HPV screening, lower vaccination                        | 2035             | 5,751                 |
| HPV screening, lower participation and vaccination      | 2042             | 6,102                 |

Elimination defined as age-standardized incidence rate <4.0/100,000, age-standardized to WHO World Population [13]

### 3. HPV-FRAME Reporting Standards

| a) Inputs                                                            | Reported?<br>(Y/N) | Reported by<br>age? (Y/N) | Comments*                                                                                                                                                                                                                                                                                                                                     |
|----------------------------------------------------------------------|--------------------|---------------------------|-----------------------------------------------------------------------------------------------------------------------------------------------------------------------------------------------------------------------------------------------------------------------------------------------------------------------------------------------|
| <b>Target population for intervention</b>                            | Y                  | Y                         | Screening in females age 25-69 years; HPV immunization in 12-year-old females and males                                                                                                                                                                                                                                                       |
| <b>Sexual behaviour</b>                                              | N                  | Not reported              | No change to HPVMM default; details available from CPAC                                                                                                                                                                                                                                                                                       |
| <b>Cohort examined for evaluation/time horizon</b>                   | Y                  | N                         | Full population of females in BC (dynamic cohort), to 2050. Population counts by age and year available from authors                                                                                                                                                                                                                          |
| <b>Quality of life assumptions</b>                                   | Not applicable     | Not applicable            | Available in OncoSim but not included in this analysis; details available from CPAC                                                                                                                                                                                                                                                           |
| <b>Calibration</b>                                                   | Not applicable     | Not reported              | Model calibration conducted by Statistics Canada and CPAC, using data from Canadian Cancer Registry and FOCAL trial                                                                                                                                                                                                                           |
| <b>Validation</b>                                                    | Y                  | N                         | Graphical comparison of model estimates compared to historical age-standardized incidence rates for cervical cancer from BC Cancer Registry; other model validation conducted by Statistics Canada and CPAC                                                                                                                                   |
| <b>Costs</b>                                                         | Not applicable     | Not applicable            | Available in OncoSim but not included in this analysis; details available from CPAC                                                                                                                                                                                                                                                           |
| <b>Routine screening behaviour</b>                                   | Y                  | N                         | Organized screening. Cytology screening scenario based on BC program design: screening every 3 years, ages 25-69 years. HPV scenarios use partial genotyping (HPV16/18, or other high-risk), every 5 years, ages 25-69 years. Screening parameter definitions and values in Box1, Table 1. Additional information in section 1 of supplement. |
| <b>Screening test and colposcopy accuracy</b>                        | N                  | Not reported              | No change to OncoSim default; details available from CPAC.                                                                                                                                                                                                                                                                                    |
| <b>Abnormal test management</b>                                      | Y                  | N                         | Reflex cytology following positive HPV test. Follow-up pathway illustrated in Figure 1.                                                                                                                                                                                                                                                       |
| <b>Diagnostic follow-up of abnormal test</b>                         | Y                  | N                         | Referral to colposcopy for HPV16/18, or other high-risk HPV with abnormal cytology. Follow-up pathway illustrated in Figure 1.                                                                                                                                                                                                                |
| <b>Management by disease grade</b>                                   | N                  | N                         | No change to OncoSim default; details available from CPAC.                                                                                                                                                                                                                                                                                    |
| <b>Sources of information for screening structure and parameters</b> | Y                  | N                         | Current program design (cytology); BC HPV self-collection pilot program design. Reports on school-based HPV vaccination from BC Centre for Disease Control. Reports on cervical cancer screening participation from BC Cancer.                                                                                                                |
| b) Outputs                                                           | Reported?<br>(Y/N) | Reported by<br>age? (Y/N) | Report as calibration or validation target? (Y/N)                                                                                                                                                                                                                                                                                             |
| <b>Cancer incidence</b>                                              | Y                  | N                         | N. Incidence by age available from authors                                                                                                                                                                                                                                                                                                    |
| <b>Cancer mortality, life-years, quality-adjusted life-years</b>     | N                  | Not applicable            | Available in OncoSim but not included in this analysis; details available from CPAC                                                                                                                                                                                                                                                           |

|                                           |   |                |                                                                                     |
|-------------------------------------------|---|----------------|-------------------------------------------------------------------------------------|
| <b>HPV prevalence, pre-intervention</b>   | N | Not reported   | Available in OncoSim but not included in this analysis; details available from CPAC |
| <b>CIN2 detected</b>                      | N | Not reported   | Available in OncoSim but not reported in this analysis; details available from CPAC |
| <b>Sensitivity analysis on key inputs</b> | Y | N              | N. Cancer incidence by age from sensitivity analysis available from authors         |
| <b>Incremental cost-effectiveness</b>     | N | Not applicable | Available in OncoSim but not included in this analysis; details available from CPAC |

\*HPV-FRAME core reporting standards and standards for models of cervical screening [14]



## References

1. Evans, W.K., et al., *Canadian Cancer Risk Management Model: evaluation of cancer control*. Int J Technol Assess Health Care, 2013. **29**(2): p. 131-9.
2. Canadian Partnership Against Cancer. *OncoSim fact sheets*. 2024 [cited 2024 February 16]; Available from: <https://www.partnershipagaincancer.ca/tools/oncosim/fact-sheets/>.
3. Miller, A.B., et al., *Evaluation of the natural history of cancer of the cervix, implications for prevention*. The Cancer Risk Management Model (CRMM) – Human papillomavirus and cervical components. Journal of Cancer Policy, 2015. **4**: p. 1-6.
4. Moore, R.A., et al., *Prevalence and type distribution of human papillomavirus in 5,000 British Columbia women--implications for vaccination*. Cancer Causes Control, 2009. **20**(8): p. 1387-96.
5. Van de Velde, N., M. Brisson, and M.-C. Boily, *Understanding differences in predictions of HPV vaccine effectiveness: A comparative model-based analysis*. Vaccine, 2010. **28**(33): p. 5473-5484.
6. Ogilvie, G.S., et al., *Effect of Screening With Primary Cervical HPV Testing vs Cytology Testing on High-grade Cervical Intraepithelial Neoplasia at 48 Months: The HPV FOCAL Randomized Clinical Trial*. JAMA, 2018. **320**(1): p. 43-52.
7. BC Centre for Disease Control, *Immunization Coverage in Grade 9 Students, 2011-2020*. 2021, BCCDC: Vancouver BC.
8. Brisson, M., et al., *Technical Appendix: HPV-Advise*. 2012.
9. Statistics Canada. *Canadian Cancer Registry (CCR)*. 2024 2024-01-30 [cited 2024 February 16]; Available from: <https://www23.statcan.gc.ca/imdb/p2SV.pl?Function=getSurvey&SDDS=3207>.
10. Blanks, R.G. and R.S. Kelly, *Comparison of cytology and histology results in English cervical screening laboratories before and after liquid-based cytology conversion: do the data provide evidence for a single category of high-grade dyskaryosis?* Cytopathology, 2010. **21**(6): p. 368-373.
11. BC Cancer. *Age-standardized Cancer Incidence Rates (ASIR) per 100,000 and Average Annual Percent Change (AAPC) British Columbia, by Cancer Type, Age at Diagnosis and Sex*. 2023 07 Sep 2023; Available from: <https://bccandataanalytics.shinyapps.io/IncidenceAgeAdjRates/>.
12. BC Cancer, *BC Cancer Cervix Screening, 2018 Program Results*. 2020, BC Cancer: Vancouver BC.
13. Ahmad, O.B., et al., *Age standardization of rates: a new WHO standard*. 2001, World Health Organization.
14. Canfell, K., et al., *HPV-FRAME: A consensus statement and quality framework for modelled evaluations of HPV-related cancer control*. Papillomavirus Res, 2019. **8**: p. 100184.
